# Supplementary material for: Investigating Synthesis of the MalS Malic Enzyme during Bacillus subtilis Spore Germination and Outgrowth and the Influence of Spore Maturation and Sporulation Conditions
Source: PubMed Central journal article supplement (PMC7407067; doi:10.1128/msphere.00464-20), 2020-08-05
Supplement: mSphere.00464-20-sf001.pdf [file mSphere.00464-20-sf001.pdf]

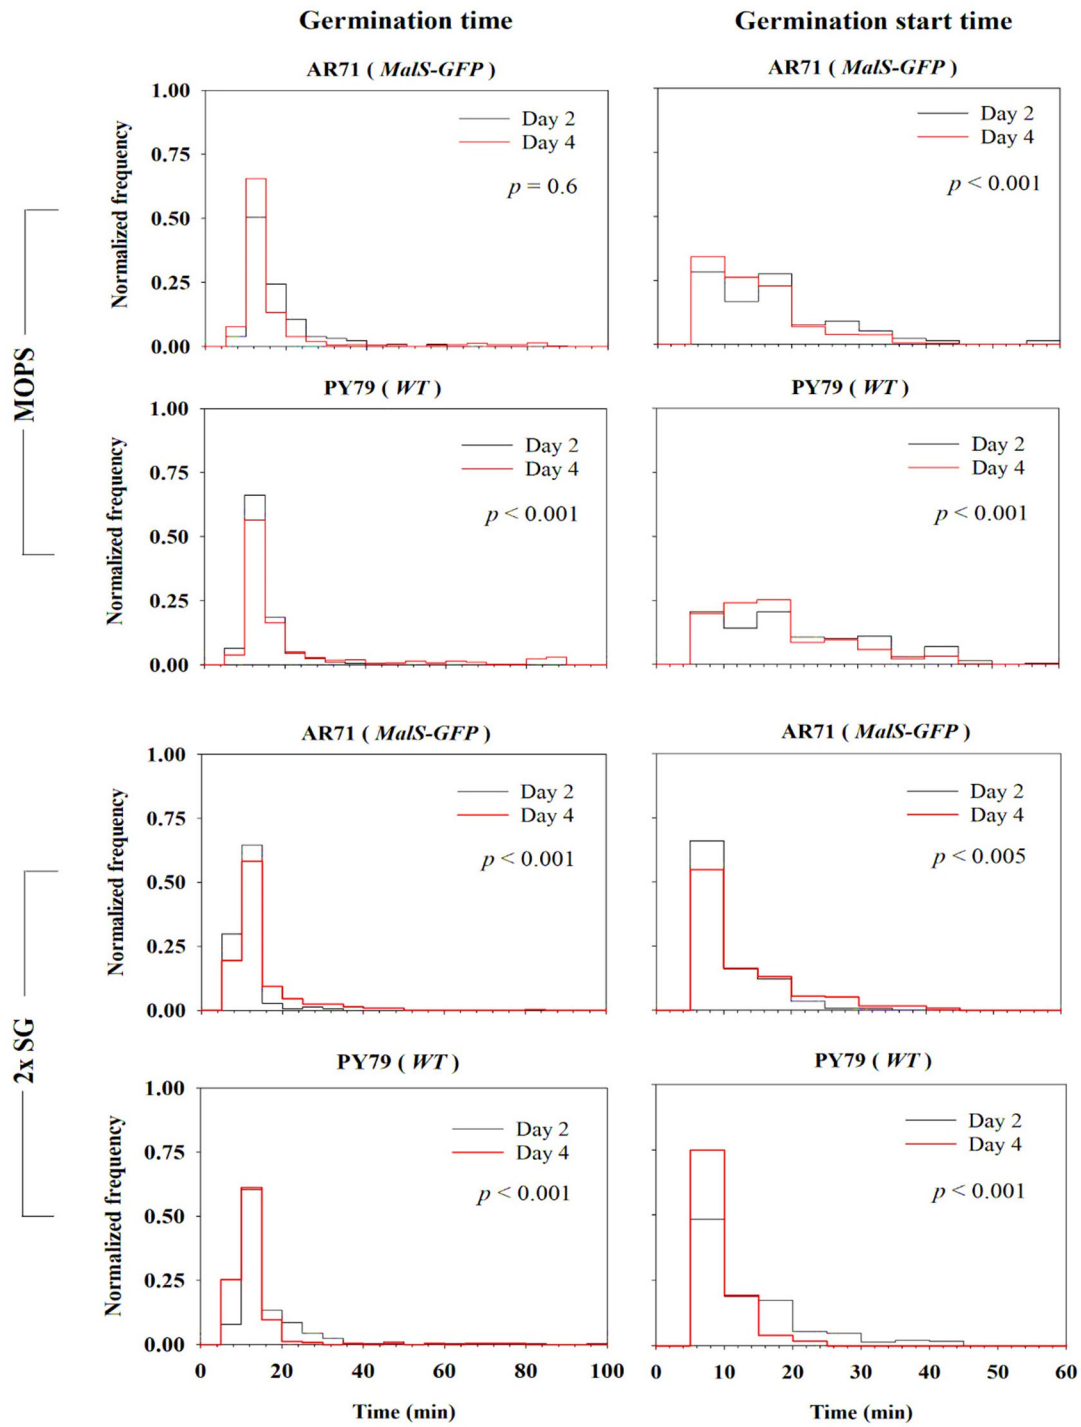

**Fig. S1. Effect of sporulation media and spore maturation time on germination behavior.**
