# Supplementary material for: Investigating Synthesis of the MalS Malic Enzyme during Bacillus subtilis Spore Germination and Outgrowth and the Influence of Spore Maturation and Sporulation Conditions
Source: PubMed Central journal article supplement (PMC7407067; doi:10.1128/msphere.00464-20), 2020-08-05
Supplement: mSphere.00464-20-st001.pdf [file mSphere.00464-20-st001.pdf]

Supplementary Table

Table S1. Germination dynamics of young and mature spores of *B. subtilis* wild type strain PY79 and mutant strain AR71 (MalS-GFP) prepared in liquid (MOPS) and solid (2x SG) media.

| Day 2                                         |            |                |                 |                              |                                               | Day 4      |               |                 |                              |                                  |
|-----------------------------------------------|------------|----------------|-----------------|------------------------------|-----------------------------------------------|------------|---------------|-----------------|------------------------------|----------------------------------|
| Medium of sporulation                         | Counts (n) | Avg. GT* (min) | Median GT (min) | Germination start time (min) | % of spores starting germination <sup>§</sup> | Counts (n) | Avg. GT (min) | Median GT (min) | Germination start time (min) | % of spores starting germination |
| <b>(A) <i>B. subtilis</i> AR71 (MalS-GFP)</b> |            |                |                 |                              |                                               |            |               |                 |                              |                                  |
| <b>MOPS (liquid)</b>                          | 131        | 12.1±0.64      | 9.6             | 5                            | 28                                            | 421        | 12.78±0.7     | 8.6             | 5                            | 34                               |
|                                               |            |                |                 | 10                           | 45                                            |            |               |                 | 10                           | 61                               |
|                                               |            |                |                 | 15                           | 73                                            |            |               |                 | 15                           | 83                               |
| <b>2x SG (solid)</b>                          | 141        | 7.2±0.28       | 7.1             | 5                            | 66                                            | 237        | 10.0±0.53     | 8.2             | 5                            | 55                               |
|                                               |            |                |                 | 10                           | 82                                            |            |               |                 | 10                           | 71                               |
|                                               |            |                |                 | 15                           | 94                                            |            |               |                 | 15                           | 84                               |
| <b>(B) <i>B. subtilis</i> PY79 (WT)</b>       |            |                |                 |                              |                                               |            |               |                 |                              |                                  |
| <b>MOPS (liquid)</b>                          | 199        | 9.6±0.3        | 9.2             | 5                            | 21                                            | 361        | 17.0±1.0      | 9.2             | 5                            | 20                               |
|                                               |            |                |                 | 10                           | 35                                            |            |               |                 | 10                           | 44                               |
|                                               |            |                |                 | 15                           | 55                                            |            |               |                 | 15                           | 69                               |
|                                               | 294        | 11.5±0.63      | 8.7             | 5                            | 48                                            | 278        | 8.5±0.46      | 7.7             | 5                            | 75                               |

**2x SG  
(solid)**

10

67

15

85

10

94

15

98
